# Supplementary material
Source: PubMed Central journal article supplement (PMC307542)
Supplement: mbc_15_1_219__1.pdf [file mbc_15_1_219__1.pdf]

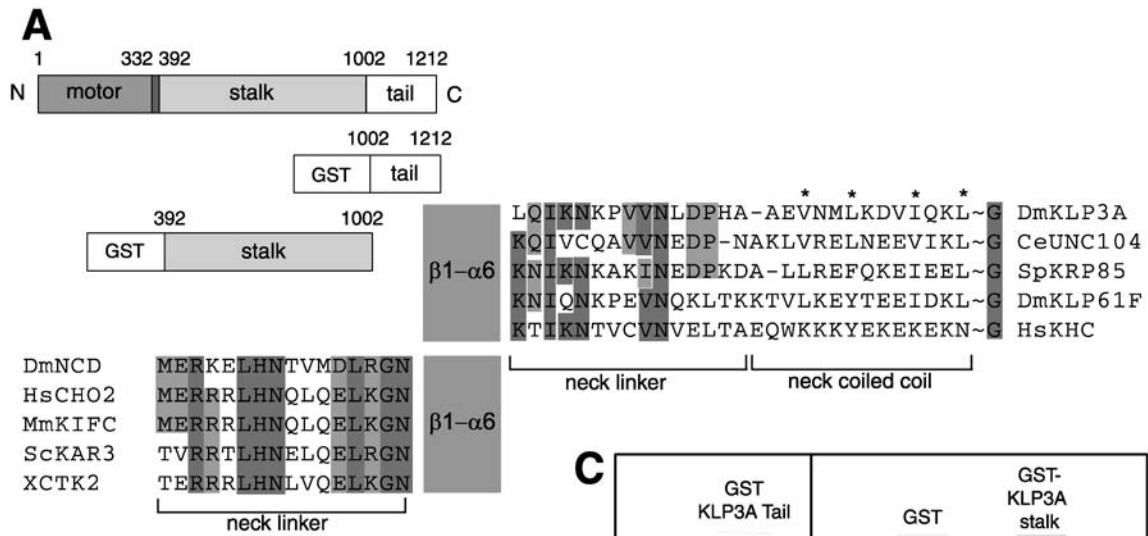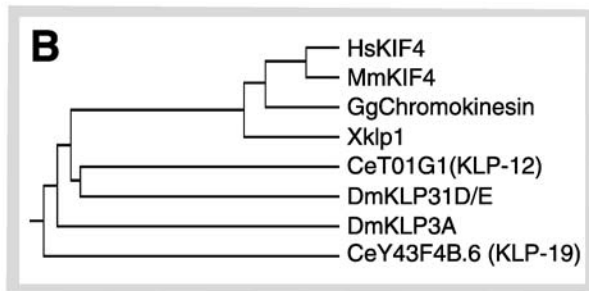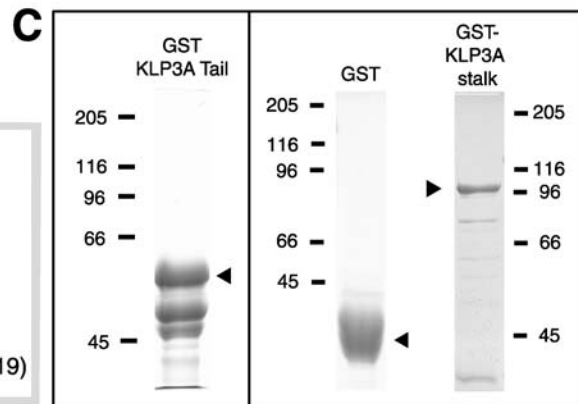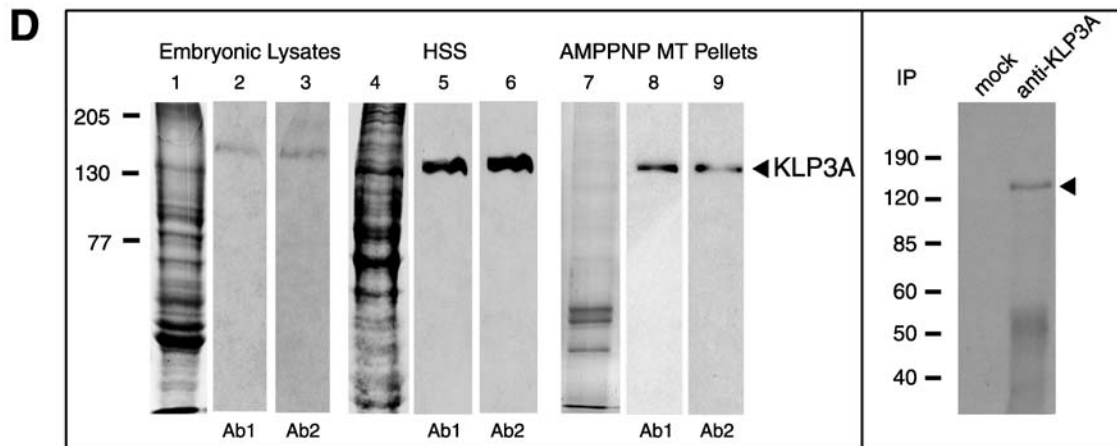

**A**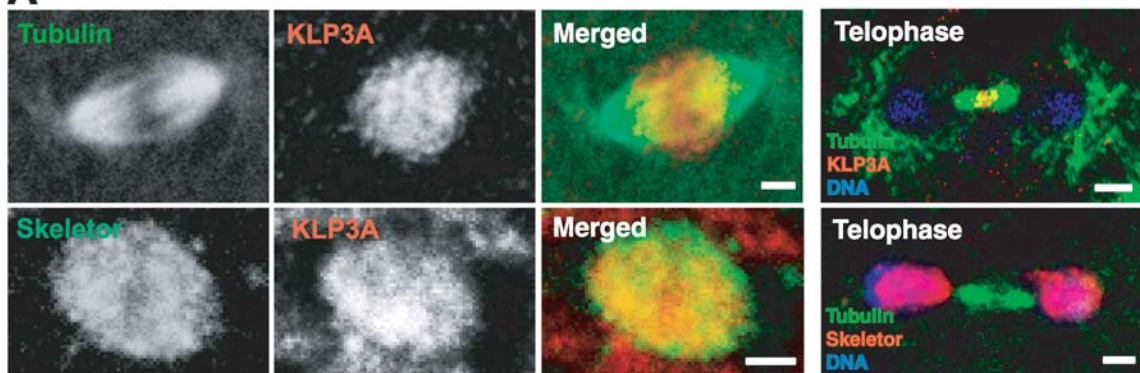**B**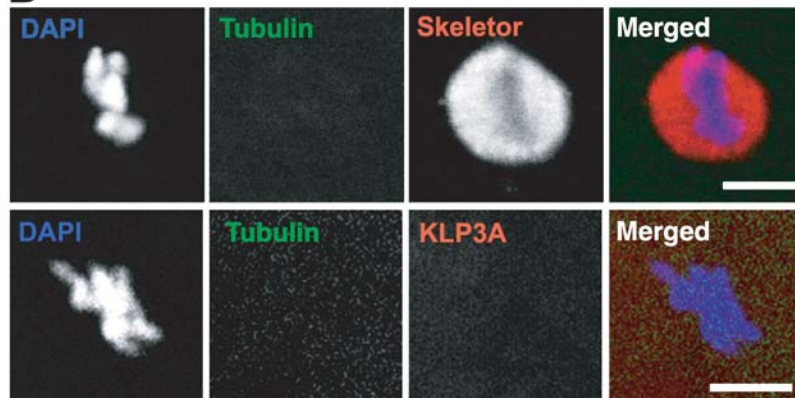

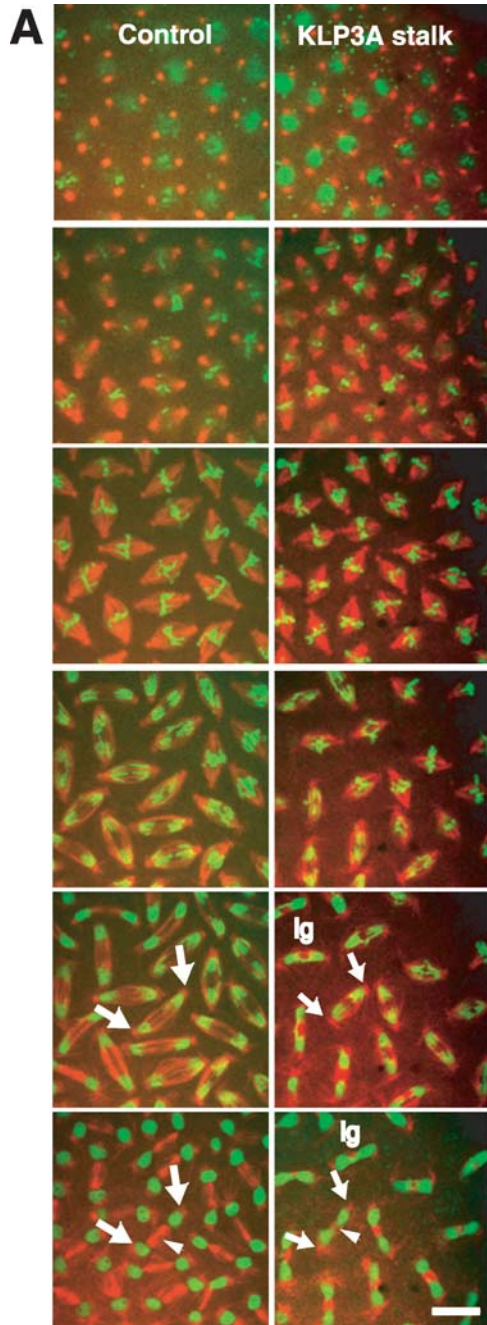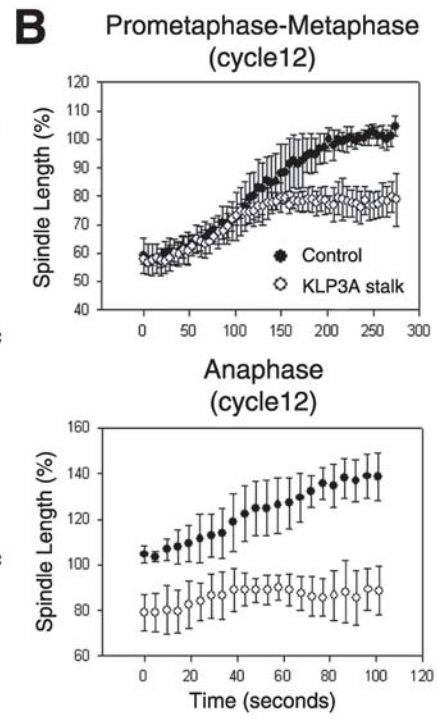

## Supplementary Figure Legends

Figure S1. **Molecular Analysis and probes for KLP3A inhibition.** (A) Top, linear maps of KLP3A and the GST-tail and GST-KLP3A stalk fragments that were used as antigen and as a dominant negative construct, respectively. The numbers above the map correspond to the amino acids for each domain of the full-length KLP3A polypeptide. Bottom, comparison of conserved neck motifs in plus end directed KinN and minus end directed KinC motors, respectively (adapted from Vale and Fletterick, 1997). This alignment indicates that KLP3A and other KinN proteins share three characteristic neck motifs following the catalytic core, 1) the sequence K/RxIxNxxxV/IN, 2) several hydrophobic residues indicative of alpha helical coiled coil formation and 3) a glycine which may mark the beginning of a flexible hinge. In contrast, KinC motors have a conserved LxE/DLKGN preceding the catalytic core. (B) Phylogenetic tree showing that KLP3A is a member of the chromokinesin family. The tree was built from kinesin motor domain sequence alignment using Clustal method with PAM250 residue weight table (Megalign software). (C) Left panel, Coomassie-stained gel showing purified recombinant GST-KLP3A tail proteins that were used to raise rabbit polyclonal antisera against KLP3A. The fusion protein runs at ~50 kD and the lower molecular weight proteins are believed to be degradation products that are recognized by anti-GST antibody on the western blot (our unpublished results). Right panel, Coomassie-stained gel showing the purity of the ~100 kD GST-KLP3A stalk or ~27 kD GST (used as control) proteins. (D) Left panel, Immunoblots showing that both anti-KLP3A antibodies specifically recognize the KLP3A polypeptide (~140 kD). Lanes 1, 4, and 7 show total

Coomassie-stained proteins of 0-2 h *Drosophila* embryonic lysates (lane 1), high speed supernatants (HSS) (lane 4) and AMPPNP MT pellets (lane 7) separated by SDS-7.5% PAGE. Lanes 2, 3, 5, 6, 8, and 9 show immunoblots probed with the affinity purified anti-KLP3A tail antibodies from two rabbits. These blots were not loaded quantitatively, and therefore do not display the enrichment for KLP3A that occurs in the MT preparations. Right panel, Western blot showing that *Drosophila* embryonic KLP3A protein was immunoprecipitated by anti-KLP3A antibodies, as indicated by arrowhead (lower band, Ig heavy chain). Mock (protein A bead only) or anti-KLP3A immunoprecipitates were run on SDS-7.5% PAGE and probed with anti-KLP3A Abs.

**Figure S2. KLP3A displays MT-dependent association with embryonic spindles concentrating in an indistinct domain that partially overlaps with chromosomes and skeletor, prior to localizing in central spindles.** (A) High magnification images of metaphase embryonic spindles stained with anti-KLP3A and anti-tubulin or anti-skeletor (mAb1A1) antibodies. Colocalization of KLP3A and skeletor on the spindle is shown in yellow in metaphase spindles but not in telophase spindles with KLP3A in midbody and skeletor in nucleus. Bar, 2  $\mu\text{m}$ . (B) 5mM colchicine-treated spindles triple labeled with DAPI (DNA), anti- $\alpha$ -tubulin and anti-KLP3A or anti-skeletor antibodies. MT depolymerization dissociates KLP3A but not skeletor from spindle remnants (some cytoplasmic KLP3A punctae remain after MT depolymerization, our unpublished results). Bar, 5  $\mu\text{m}$ .

**Figure S3. Effects of microinjection of dominant negative GST-KLP3A stalk proteins on mitosis.** (A) Time-lapse confocal micrographs from embryos injected with GST (control) or GST-KLP3A stalk proteins, showing defects in the positioning of spindle poles and daughter nuclei following KLP3A inhibition. For KLP3A stalk injection, the images were taken from the region proximal to the injection site in the embryo (corresponding to region A, Fig. 2 C; see Online Supplemental Material, “Movie 7, KLP3A stalk injection”). Each panel indicates representative images from different time points corresponding to NEB, prometaphase, metaphase, anaphase A, anaphase B, and telophase with tubulin in red and chromosomes in green. Bar. 10  $\mu\text{m}$ . (B) Plots showing spindle pole separation as a function of time for GST (control) and dominant negative KLP3A stalk- injected embryos.
