# Supplementary material
Source: PubMed Central journal article supplement (PMC307542)
Supplement: mbc_15_1_219__2.pdf [file mbc_15_1_219__2.pdf]

## Supplementary Tables

**Table SI. S2 cell mitotic index and metaphase spindle length after RNAi**

|            | Mitotic index   | Prophase <sup>c</sup> | Metaphase <sup>c</sup> | Anaphase <sup>c</sup> | Telophase <sup>c</sup> | Spindle length <sup>d</sup>    |
|------------|-----------------|-----------------------|------------------------|-----------------------|------------------------|--------------------------------|
|            |                 |                       |                        | %                     |                        |                                |
| Control    | 12 <sup>a</sup> | 5.4                   | 58.1                   | 6.2                   | 30.2                   | 45.6 ± 8.7 (n=25)              |
| KLP3A RNAi | 19 <sup>b</sup> | 1.04                  | 84.3                   | 0                     | 14.5                   | 35.9 ± 8.7 (n=30) <sup>e</sup> |

Fixed cells were stained for DNA and tubulin. By immunofluorescence the number of cells with mitotic figures was scored and each cell's phase was determined. Analysis of KLP3A (RNAi) cells was done in cells that were KLP3A negative by immunostaining.

The mitotic index is the percentage of cells in mitosis from total number of cells observed (n<sup>a</sup>=1087 and n<sup>b</sup>=506).

(c) Percentage of mitotic cells found in each phase.

(d) Metaphase spindle length as a percentage of the cell's diameter (n=the number of metaphase cells).

(e) Metaphase spindle length was obtained only from those spindles with a bipolar morphology and focused poles after KLP3A RNAi.

**Table SII. Spindle morphology following KLP3A inhibition**

| Axial ratio<br>(Y/X)                                                              | Antibody inhibition |              | Dominant negative |              |
|-----------------------------------------------------------------------------------|---------------------|--------------|-------------------|--------------|
|                                                                                   | Control IgG         | Anti-KLP3A   | Control GST       | KLP3A stalk  |
| Metaphase                                                                         | 0.43 ± 0.05         | 0.54 ± 0.07  | 0.42 ± 0.06       | 0.58 ± 0.08  |
|  | (25/4)              | (26/4)       | (29/4)            | (35/4)       |
| Anaphase A                                                                        | 0.41 ± 0.05         | 0.56 ± 0.10  | 0.39 ± 0.06       | 0.58 ± 0.06  |
|  | (25/4)              | (24/4)       | (29/4)            | (30/4)       |
| Anaphase B                                                                        | 0.30 ± 0.04         | 0.72 ± 0.14* | 0.28 ± 0.03       | 0.68 ± 0.07* |
|  | (25/4)              | (11/5)       | (29/4)            | (13/4)       |

Axial ratio is shown as spindle width (Y, red line) divided by spindle length (X, green line) in the cartoon showing spindle morphology (control, left and KLP3A inhibition, right).

Parentheses indicate numbers of spindles and embryos, respectively.

\* Because of splayed morphology of spindle MTs following KLP3A inhibition, data were obtained only from spindles with well-defined perimeters.
