# Supplementary material
Source: PubMed Central journal article supplement (PMC307542)

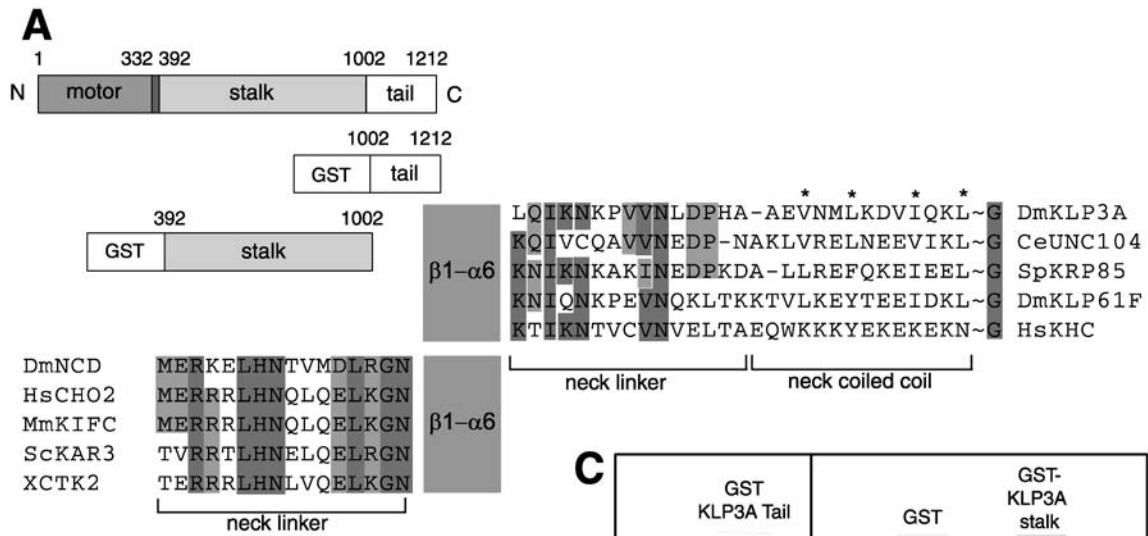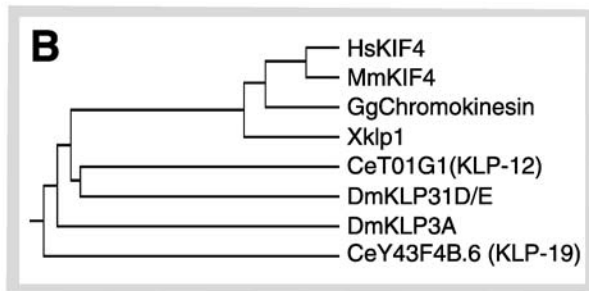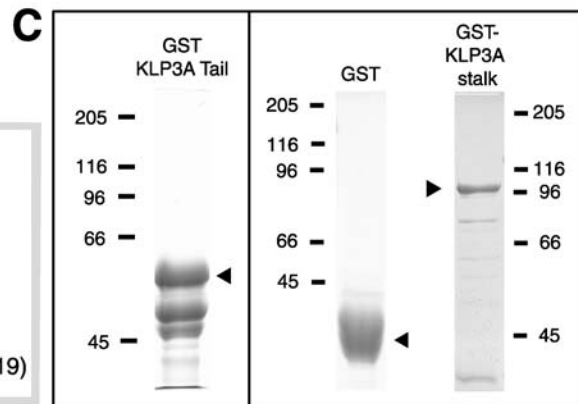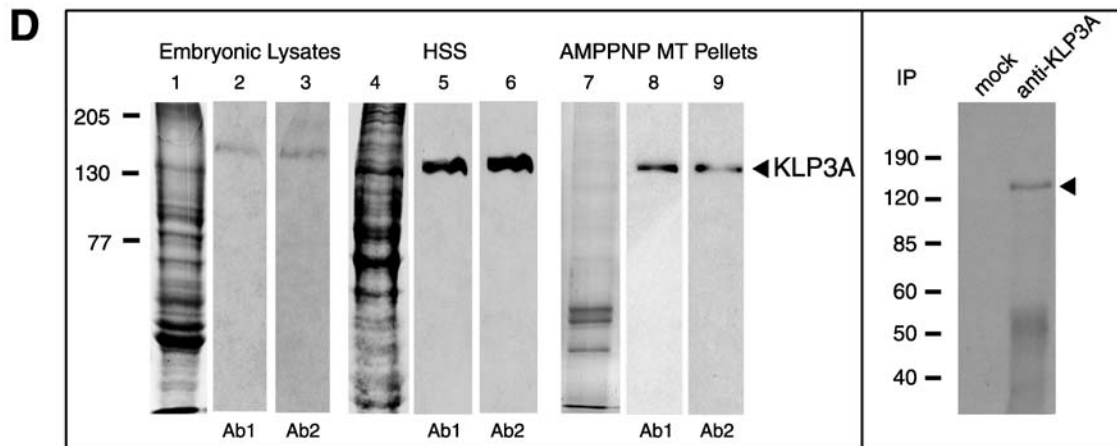

Supplement: mbc_15_1_219__3.pdf [file mbc_15_1_219__3.pdf]

**A**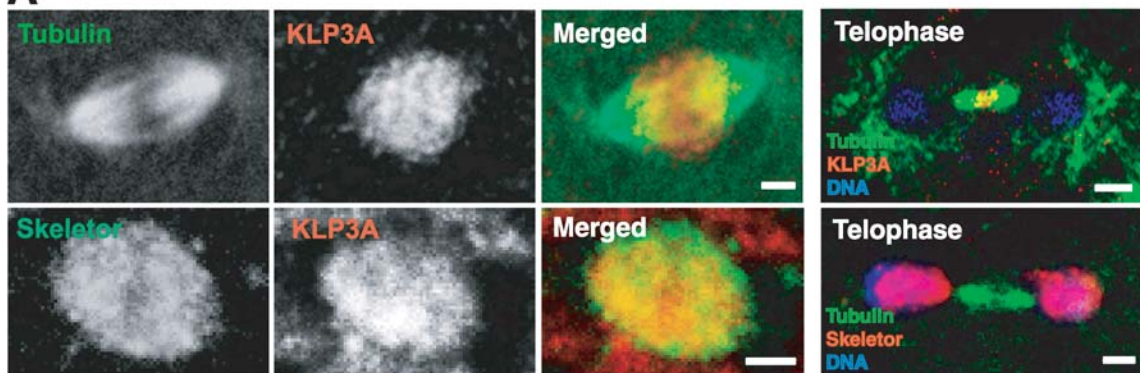**B**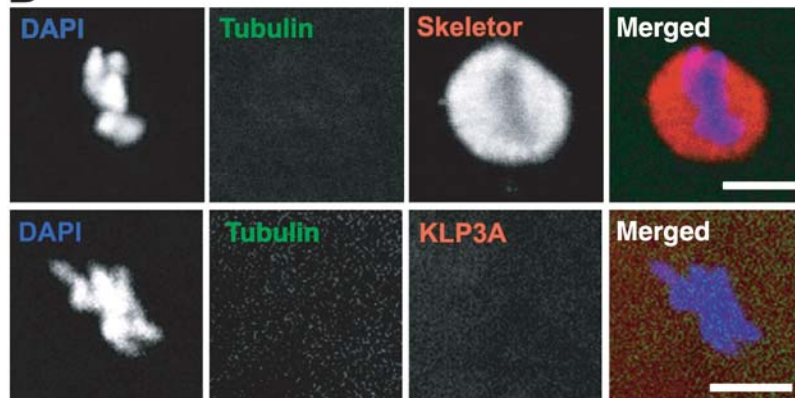

Supplement: mbc_15_1_219__4.pdf [file mbc_15_1_219__4.pdf]

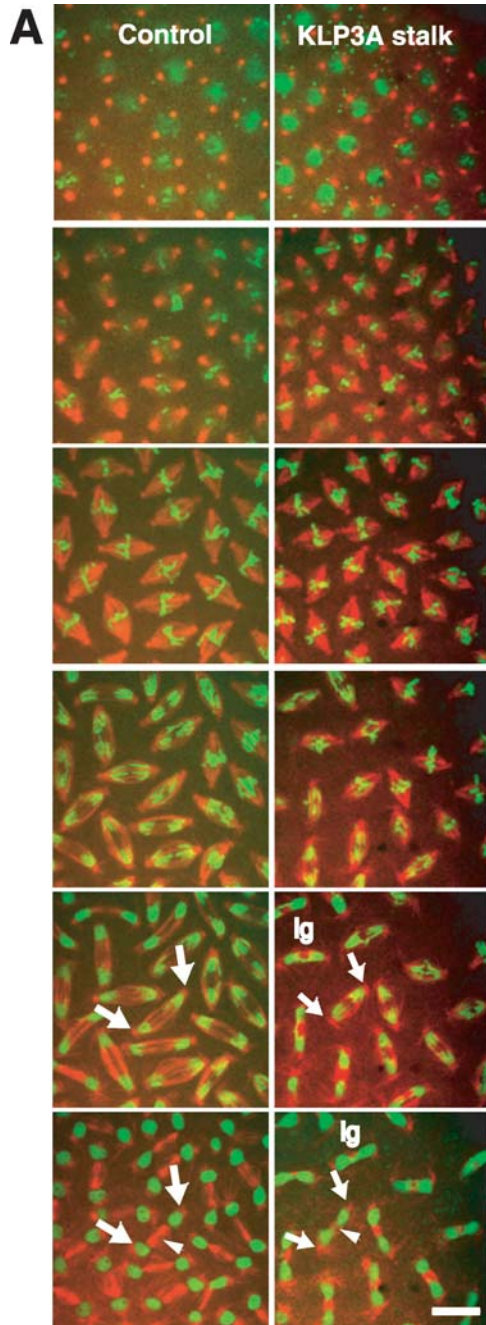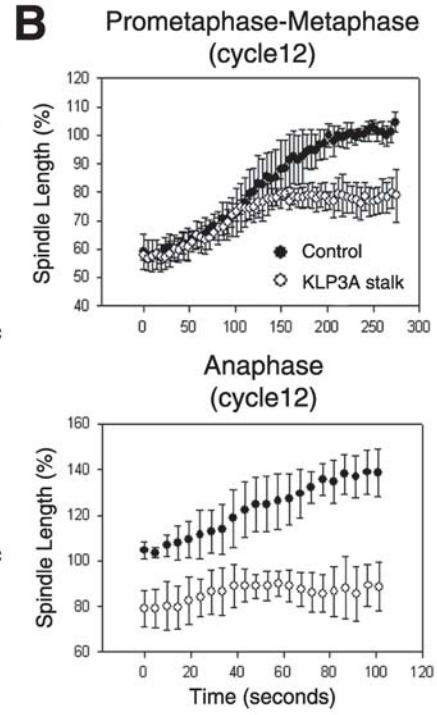

Supplement: mbc_15_1_219__5.pdf [file mbc_15_1_219__5.pdf]
